# Supplementary material
Source: PubMed Central journal article supplement (PMC1447667)
Supplement: ppat.0020032.sg001.pdf [file ppat.0020032.sg001.pdf]

**Figure S1.**

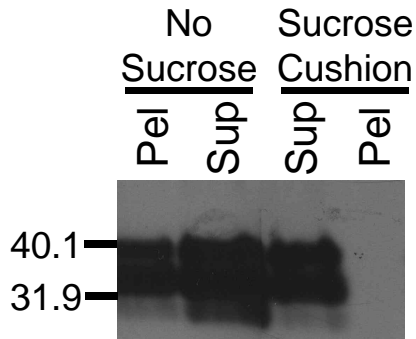

**Figure S1.** Sucrose cushion prevented sedimentation of unbound PrP<sup>Sc</sup> under conditions necessary to pellet soil minerals. A substantial amount of unbound PrP<sup>Sc</sup> pelleted when centrifuged under conditions required to remove Na<sup>+</sup>-Mte from suspension, but was prevented from sedimenting by a sucrose cushion. Sucrose cushions were therefore employed in batch adsorption experiments to prevent sedimentation of unbound PrP<sup>Sc</sup>. Results from representative mock adsorption experiments are shown. PrP<sup>Sc</sup> was rotated in a solution of 10 mM NaCl in the absence of soil minerals for 2 h and was either placed above a 750 mM sucrose cushion and centrifuged (two right lanes), or centrifuged without a sucrose cushion (two left lanes). Supernatants (Sup) and pellets (Pel) were analyzed by immunoblotting with mAb 3F4.
